# Supplementary material for: A novel proangiogenic B cell subset is increased in cancer and chronic inflammation
Source: PubMed Central journal article supplement — Sci Adv. 2020 May 13;6(20):eaaz3559. doi: 10.1126/sciadv.aaz3559 (PMC7220305; doi:10.1126/sciadv.aaz3559), 2020-05-13
Supplement: aaz3559_SM.pdf [file aaz3559_SM.pdf]

## Supplementary Materials for

### **A novel proangiogenic B cell subset is increased in cancer and chronic inflammation**

Willem van de Veen, Anna Globinska, Kirstin Jansen, Alex Straumann, Terufumi Kubo, Daniëlle Verschoor, Oliver F. Wirz, Francesc Castro-Giner, Ge Tan, Beate Rückert, Urs Ochsner, Marietta Herrmann, Barbara Stanić, Marloes van Splunter, Daan Huntjens, Alexandra Wallimann, Rodney J. Fonseca Guevara, Hergen Spits, Desislava Ignatova, Yun-Tsan Chang, Christina Fassnacht, Emmanuella Guenova, Lukas Flatz, Cezmi A. Akdis, Mübeccel Akdis\*

\*Corresponding author. Email: akdism@siaf.uzh.ch

Published 13 May 2020, *Sci. Adv.* **6**, eaaz3559 (2020)  
DOI: 10.1126/sciadv.aaz3559

#### **This PDF file includes:**

Figs. S1 to S5  
Tables S1 to S6

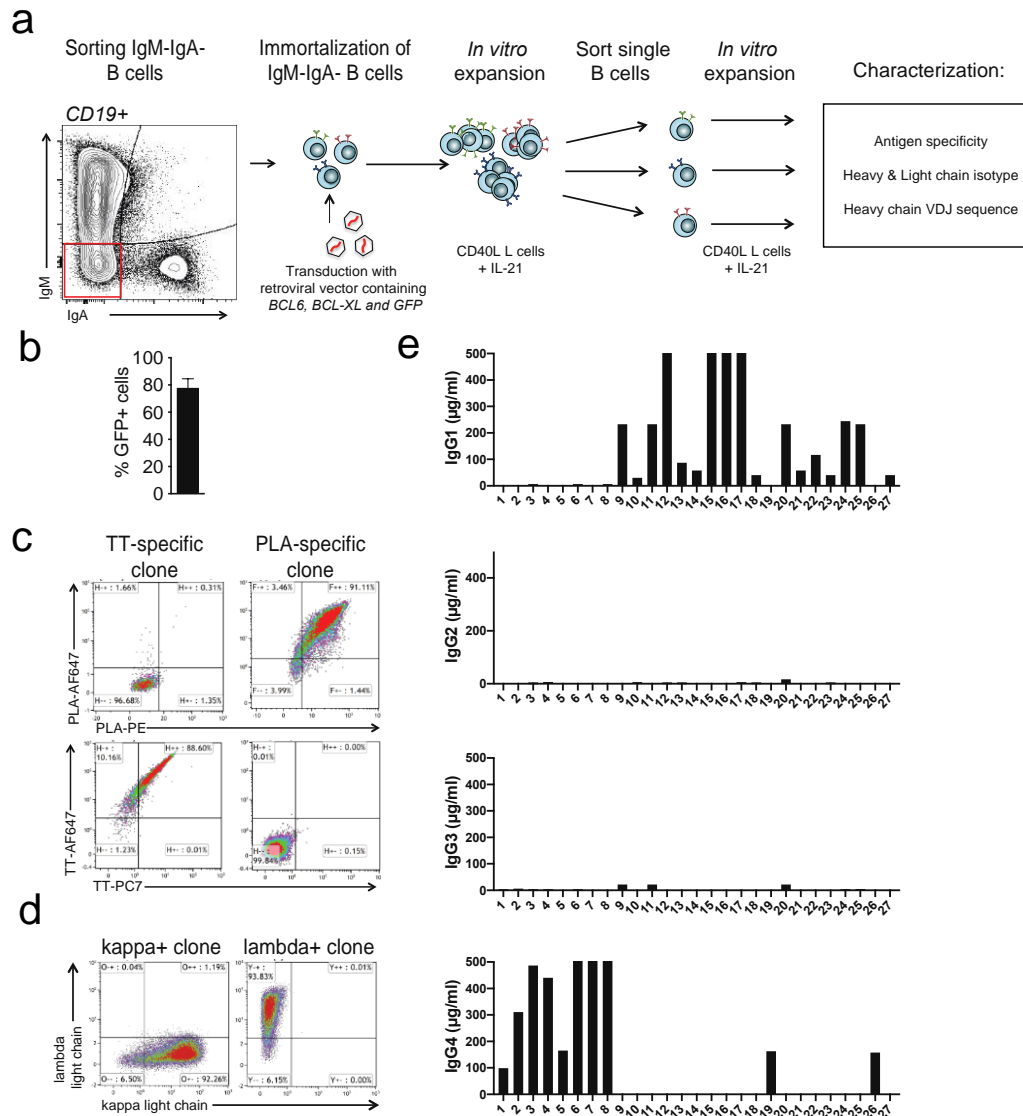

**Fig. S1. Generation and characterization of B cell clones.** (a) CD19+IgM-IgA- B cell pools were sorted and immortalized. After 3 days *in vitro* expansion the transduction efficiency was measured by analysis of GFP expression (b). Single cells specific for PLA or TT were sorted and expanded for 6 weeks in the presence of CD40L and IL-21 (a). Antigen specificity of purified clones was assessed by staining with fluorescently labeled TT and PLA (c). Immunoglobulin light chain isotypes were determined by flow cytometry (d) and immunoglobulin heavy chain isotypes were determined using bead suspension array (e).



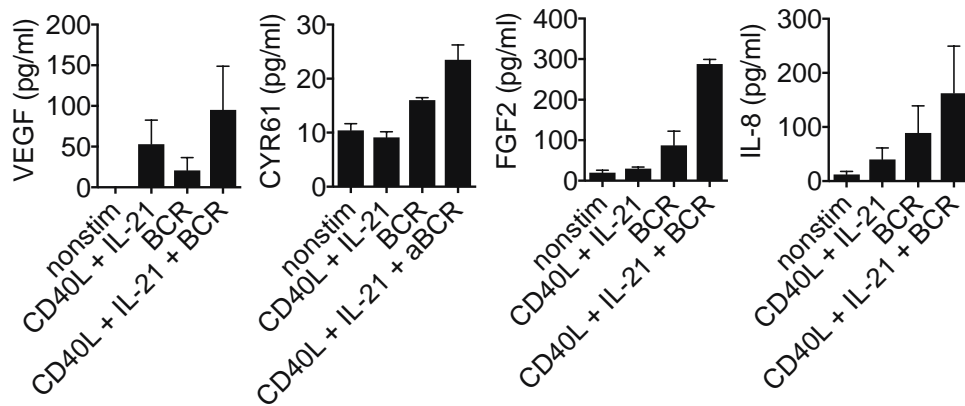

**Fig. S3 Primary B cells can produce pro-angiogenic cytokines.** Measurement of secreted pro-angiogenic cytokines in supernatants of purified primary peripheral B cells after 3 days stimulation.

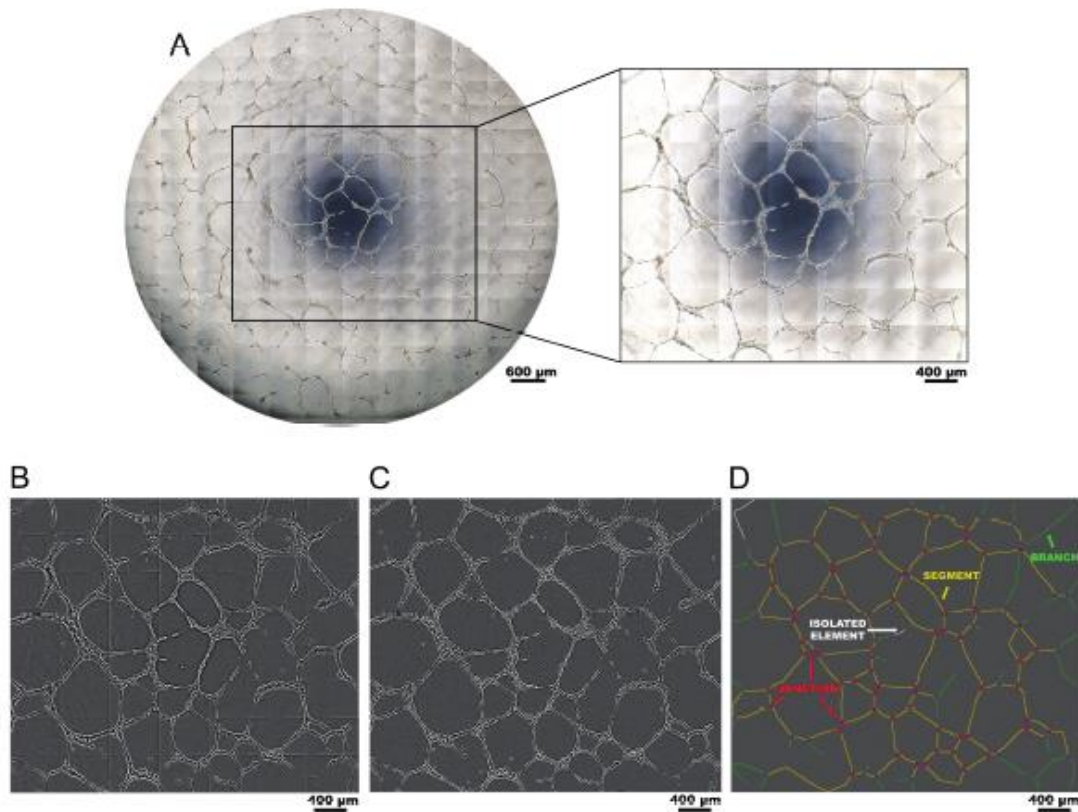

**Fig. S4** Data processing and quantification of HUVEC tube formation assay. **(a)** Original image of the whole well and representative area of the well. **(b)** Adobe Photoshop processing step 1 - background reduction: Filter → High Pass (Radius: 10 px) and step 2 - **(c)** stitching lines removal: Tools → Spot Healing Brush Tool (Size: 15 px). **(d)** Final quantification performed with the use of ImageJ and default settings of Angiogenesis Analyzer. The number of junctions and total length [px] were used as parameters for quantification of the rate of tube formation.

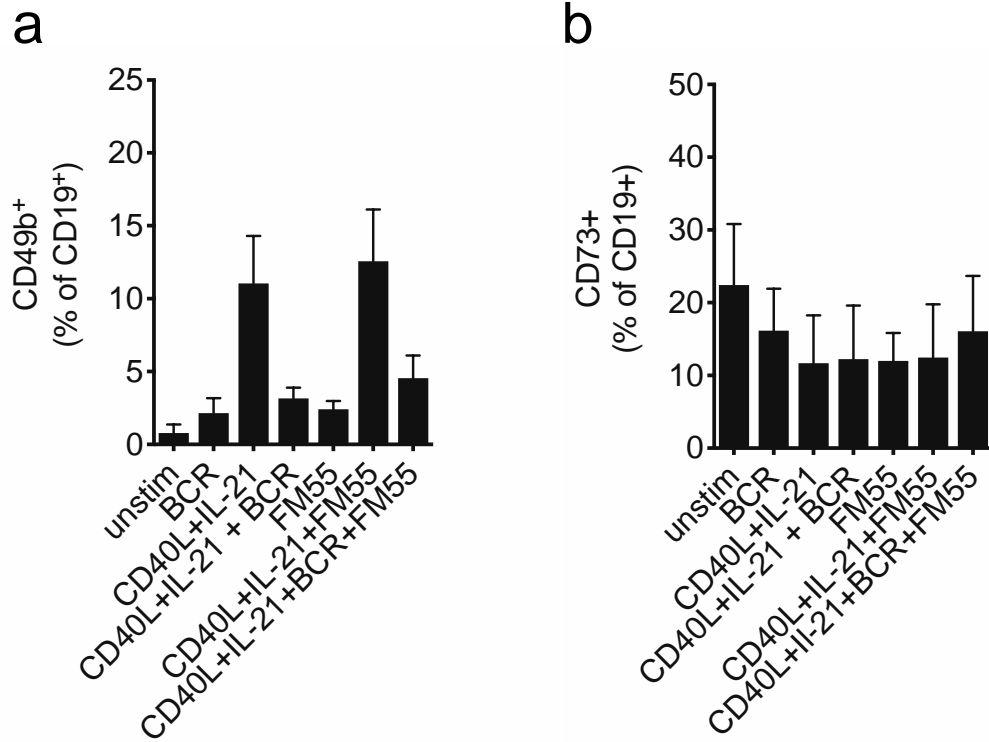

**Fig. S5** Effect of co-culturing melanoma cells with primary B cells on the expression of CD49b (a) and CD73 (b). B cells were cultured for three days and expression of CD49b and CD73 was analyzed by flow cytometry.

Table S1. Clone Characteristics

| Clone ID | Gender | Donor ID | Heavy chain isotype | Light chain isotype | V gene and allele | J gene and allele | D gene and allele |
|----------|--------|----------|---------------------|---------------------|-------------------|-------------------|-------------------|
| 1        | Female | 1        | IgG4                | lambda              | V1-18*04          | J5*02             | D5-12*01          |
| 2        | Male   | 2        | IgG4                | lambda              | V3-53*01          | J4*02             | D6-13*01          |
| 3        | Male   | 2        | IgG4                | kappa               | V1-46*01          | J3*02             | D3-10*01          |
| 4        | Male   | 2        | IgG4                | kappa               | V1-2*02           | ND                | ND                |
| 5        | Male   | 2        | IgG4                | kappa               | V5-51*01          | J3*02             | D3-22*01          |
| 6        | Male   | 2        | IgG4                | kappa               | V3-30*03          | J1*01             | D4-23*01          |
| 7        | Male   | 2        | IgG4                | kappa               | V3-33**01         | J3*01             | D1-20*01          |
| 8        | Male   | 3        | IgG4                | kappa               | ND                | ND                | ND                |
| 9        | Female | 4        | IgG1                | ND                  | ND                | ND                | ND                |
| 10       | Male   | 5        | IgG1                | lambda              | V1-69*09          | J6*02             | D6-13*01          |
| 11       | Male   | 5        | IgG1                | kappa               | V3-30*03          | J1*01             | D5-18*01          |
| 12       | Male   | 5        | IgG1                | kappa               | V3-74*01          | J2*01             | D3-10*01          |
| 13       | Male   | 5        | IgG1                | kappa               | V3-74*01          | J6*02             | D4-17*01          |
| 14       | Male   | 5        | IgG1                | kappa               | V3-30*03          | J4*02             | D3-22*01          |
| 15       | Male   | 6        | IgG1                | kappa               | V3-20*01          | J3*01             | ND                |
| 16       | Male   | 6        | IgG1                | kappa               | V1-18*01          | J4*02             | D1-26*01          |
| 17       | Male   | 6        | IgG1                | kappa               | V3-23*04          | J4*02             | D2-2*01           |
| 18       | Male   | 6        | IgG1                | kappa               | V3-9*01           | J4*02             | D5-12*01          |
| 19       | Male   | 6        | IgG4                | lambda              | V3-30*03          | J1*01             | D4-23*01          |
| 20       | Male   | 6        | IgG1                | kappa               | ND                | ND                | ND                |
| 21       | Male   | 7        | IgG1                | kappa               | V3-20*01          | J6-03             | D2-15*01          |
| 22       | Male   | 7        | IgG1                | kappa               | V3-53*04          | J5*03             | D5-13*01          |
| 23       | Male   | 7        | IgG1                | kappa               | V3-9*01           | J4*02             | D4-17*01          |
| 24       | Male   | 7        | IgG1                | ND                  | V1-58*01          | J4*02             | D1-26*01          |
| 25       | Male   | 7        | IgG1                | kappa               | V5-51*01          | J2*02             | D3-16*01          |
| 26       | Male   | 7        | IgG4                | kappa               | V1-69*01          | J4*02             | D3-9*01           |
| 27       | Male   | 8        | IgG1                | lambda              | V4-59*01          | J6*03             | D3-9*01           |

ND Not determined

Table S2. Melanoma patient characteristics

| <b>Donor ID</b> | <b>Age at sampling</b> | <b>Gender</b> | <b>Diagnosis and stage</b> | <b>Material analyzed</b> | <b>Analysis</b>     |
|-----------------|------------------------|---------------|----------------------------|--------------------------|---------------------|
| M1              | 45                     | female        | melanoma stage IIIc        | Resected tissue          | Confocal microscopy |
| M2              | 93                     | male          | melanoma stage IV          | Resected tissue          | Confocal microscopy |
| M3              | 73                     | female        | melanoma stage IV          | Resected tissue          | Confocal microscopy |
| M4              | 75                     | male          | melanoma stage IV          | Resected tissue          | Confocal microscopy |
| M5              | 65                     | male          | melanoma stage IV          | Resected tissue          | Confocal microscopy |
| M6              | 33                     | female        | melanoma stage IV          | Resected tissue          | Confocal microscopy |
| M7              | 52                     | female        | melanoma stage IIIa        | Resected tissue          | Confocal microscopy |
| M8              | 56                     | female        | melanoma stage IIIc        | Resected tissue          | Confocal microscopy |
| M9              | 65                     | male          | melanoma stage IV          | Resected tissue          | Confocal microscopy |
| M10             | 36                     | female        | melanoma stage IV          | PBMC                     | Flow cytometry      |
| M11             | 74                     | female        | melanoma stage IV          | PBMC                     | Flow cytometry      |
| M12             | 56                     | female        | melanoma stage IIIb        | PBMC                     | Flow cytometry      |
| M13             | 73                     | female        | melanoma stage IV          | PBMC                     | Flow cytometry      |
| M14             | 53                     | male          | melanoma stage IIIc        | PBMC                     | Flow cytometry      |
| M15             | 67                     | male          | melanoma stage IV          | PBMC                     | Flow cytometry      |
| M16             | 33                     | male          | melanoma stage IIIb        | PBMC                     | Flow cytometry      |
| M17             | 69                     | male          | melanoma stage IV          | PBMC                     | Flow cytometry      |
| M18             | 45                     | female        | melanoma stage IIIc        | PBMC and resected tissue | Flow cytometry      |
| M19             | 93                     | male          | melanoma stage IV          | PBMC and resected tissue | Flow cytometry      |
| M20             | 53                     | male          | melanoma stage IIIc        | PBMC                     | Flow cytometry      |
| M21             | 73                     | female        | melanoma stage IV          | PBMC                     | Flow cytometry      |
| M22             | 50                     | male          | melanoma stage IV          | PBMC and resected tissue | Flow cytometry      |
| M23             | 93                     | male          | melanoma stage IIIb        | PBMC                     | Flow cytometry      |
| M24             | 69                     | female        | melanoma stage IV          | PBMC                     | Flow cytometry      |
| M25             | 77                     | female        | melanoma stage IV          | PBMC                     | Flow cytometry      |
| M26             | 61                     | male          | melanoma stage IV          | PBMC                     | Flow cytometry      |
| M27             | 86                     | female        | melanoma stage IV          | PBMC                     | Flow cytometry      |
| M28             | 65                     | male          | melanoma stage IV          | PBMC                     | Flow cytometry      |
| M29             | 85                     | male          | melanoma stage IV          | PBMC                     | Flow cytometry      |
| M30             | 77                     | male          | melanoma stage IV          | PBMC                     | Flow cytometry      |
| M31             | 65                     | female        | melanoma stage IV          | PBMC                     | Flow cytometry      |
| M32             | 60                     | female        | melanoma stage IV          | PBMC                     | Flow cytometry      |
| M33             | 70                     | female        | melanoma stage IV          | PBMC                     | Flow cytometry      |



**Table S3. EoE patient characteristics**

| Donor ID | Age (years) | Gender | Food allergy                | Symptoms                                  | ENDOSCOPIC FINDINGS           |       |         |          |       |            | HISTOLOGY |                                                              |                                             |                                                                          | SYMPTOMS (current)  |                                                           | TREATMENT (current)                                     |                                           |                                            |                                  |                          |                                         |                                                                                                                |
|----------|-------------|--------|-----------------------------|-------------------------------------------|-------------------------------|-------|---------|----------|-------|------------|-----------|--------------------------------------------------------------|---------------------------------------------|--------------------------------------------------------------------------|---------------------|-----------------------------------------------------------|---------------------------------------------------------|-------------------------------------------|--------------------------------------------|----------------------------------|--------------------------|-----------------------------------------|----------------------------------------------------------------------------------------------------------------|
|          |             |        |                             |                                           | severe (oesophageal blockage) | Edema | Furrows | Exudates | Rings | Strictures | Others    | Peak epithelial Eos/hpf (size of hpf 0.3072mm <sup>2</sup> ) | Peak epithelial Eos 0 (0), 1 (0-40), 3 > 40 | Peak stromal/lamina propria Eos/hpf (size of hpf 0.3072mm <sup>2</sup> ) | Peak stromal/lp Eos | Spongiosis 1 = absent, 2 = mild, 3 = moderate, 4 = severe | Fibrosis 1 = absent, 2 = mild, 3 = moderate, 4 = severe | EoE-Drug Budesonide 1 = Y (mg/day), 2 = N | EoE-Drug Fluticasone 1 = Y (mg/day), 2 = N | EoE-Drug 3 1 = Y (mg/day), 2 = N | PPI 1 = Y (which), 2 = N | Systemic Steroids 1 = Y (mg/day), 2 = N | Dietary Treatment 1 = N, 2 = Elemental Diet, 3 = Targeted Diet, 4 = Empirical Diet, 5 = Other Diets (describe) |
| EoE1     | 37          | m      | No                          | severe (oesophageal blockage)             | Yes                           | No    | No      | Yes      | No    | No         | 0         | 0                                                            | 0                                           | 0                                                                        | 1                   | 6                                                         | 1; 2mg/day                                              | 2                                         | 2                                          | 1 (esomep)                       | 2                        | 1                                       | 2                                                                                                              |
| EoE2     | 18          | f      | No                          | moderate (frequent difficulty swallowing) | Yes                           | Yes   | No      | Yes      | No    | No         | 35        | 1                                                            | 50                                          | 2                                                                        | 2                   | 3                                                         | 2                                                       | 1; 2                                      | 2                                          | 2                                | 2                        | 2                                       | 2                                                                                                              |
| EoE3     | 24          | m      | No                          | mild (occasional difficulty swallowing)   | Yes                           | No    | No      | Yes      | No    | No         | 17        | 1                                                            | 40                                          | 2                                                                        | 2                   | 2                                                         | 2                                                       | 1; 0.5                                    | 2                                          | 2                                | 2                        | 2                                       | 2                                                                                                              |
| EoE4     | 56          | m      | No                          | absent                                    | No                            | No    | No      | Yes      | No    | No         | 0         | 0                                                            | 0                                           | 0                                                                        | 1                   | 2                                                         | 2                                                       | 1; 0.5                                    | 2                                          | 2                                | 2                        | 2                                       | 2                                                                                                              |
| EoE5     | 45          | f      | No                          | absent                                    | Yes                           | Yes   | No      | Yes      | No    | No         | 58        | 2                                                            | 5                                           | 1                                                                        | 2                   | 2                                                         | 2                                                       | 2                                         | 2                                          | Pantoprazol                      | 2                        | 2                                       | 2                                                                                                              |
| EoE6     | 35          | f      | No                          | moderate (frequent difficulty swallowing) | Yes                           | Yes   | No      | Yes      | Yes   | No         | 35        | 1                                                            | 40                                          | 2                                                                        | 2                   | 3                                                         | 2                                                       | 1; 1.0                                    | 2                                          | 2                                | 2                        | 2                                       | 2                                                                                                              |
| EoE7     | 44          | m      | No                          | moderate (frequent difficulty swallowing) | Yes                           | Yes   | Yes     | Yes      | No    | No         | 63        | 2                                                            | 15                                          | 1                                                                        | 4                   | 3                                                         | 2                                                       | 2                                         | 2                                          | 2                                | 2                        | 4 (milk 3 months)                       | 2                                                                                                              |
| EoE8     | 86          | m      | No                          | mild (occasional difficulty swallowing)   | No                            | No    | No      | No       | No    | Nodules    | 0         | 0                                                            | 0                                           | 0                                                                        | 1                   | 1                                                         | 2                                                       | 1; 0.5                                    | 2                                          | 2                                | 2                        | 2                                       | 2                                                                                                              |
| EoE9     | 27          | m      | No                          | mild (occasional difficulty swallowing)   | Yes                           | Yes   | Yes     | Yes      | No    | No         | 170       | 2                                                            | 30                                          | 1                                                                        | 3                   | 3                                                         | 2                                                       | 1; 2                                      | 2                                          | 2                                | 2                        | 2                                       | 2                                                                                                              |
| EoE10    | 66          | m      | No                          | absent                                    | No                            | No    | No      | Yes      | Yes   | No         | 0         | 0                                                            | 10                                          | 1                                                                        | 1                   | 3                                                         | 2                                                       | 2                                         | 2                                          | 2                                | 2                        | 4 (milk 3 months)                       | 2                                                                                                              |
| EoE11    | 41          | m      | No                          | severe (oesophageal blockage)             | Yes                           | Yes   | No      | Yes      | No    | No         | 29        | 1                                                            | 10                                          | 1                                                                        | 2                   | 2                                                         | 2                                                       | 1; 0.5                                    | 2                                          | 2                                | 2                        | 2                                       | 2                                                                                                              |
| EoE12    | 74          | m      | No                          | moderate (frequent difficulty swallowing) | No                            | No    | No      | No       | No    | Nodules    | 0         | 0                                                            | 4                                           | 1                                                                        | 1                   | 2                                                         | 2                                                       | 1; 0.5                                    | 2                                          | 2                                | 2                        | 2                                       | 2                                                                                                              |
| EoE13    | 17          | f      | Yes (oral allergy syndrome) | mild (occasional difficulty swallowing)   | Yes                           | Yes   | No      | Yes      | No    | No         | 80        | 2                                                            | 20                                          | 1                                                                        | 3                   | 2                                                         | 2                                                       | 2                                         | 2                                          | 2                                | 2                        | 4 (milk 3 months)                       | 2                                                                                                              |
| EoE14    | 23          | m      | No                          | moderate (frequent difficulty swallowing) | Yes                           | Yes   | Yes     | Yes      | No    | No         | 42        | 2                                                            | not measured                                |                                                                          | 4                   | 3                                                         | 2                                                       | 2                                         | 2                                          | 2                                | 2                        | 2                                       | 2                                                                                                              |
| EoE15    | 22          | m      | No                          | moderate (frequent difficulty swallowing) | Yes                           | Yes   | No      | Yes      | No    | No         | 50        | 2                                                            | 5                                           | 1                                                                        | 3                   | 2                                                         | 2                                                       | 2                                         | 2                                          | 2                                | 2                        | 4 (milk 3 months)                       | 2                                                                                                              |
| EoE16    | 51          | m      | No                          | mild (occasional difficulty swallowing)   | Yes                           | Yes   | No      | Yes      | No    | No         | 74        | 2                                                            | 150                                         | 2                                                                        | 3                   | 2                                                         | 2                                                       | 1; 0.5                                    | 2                                          | 2                                | 2                        | 2                                       | 2                                                                                                              |
| EoE17    | 71          | m      | No                          | mild (occasional difficulty swallowing)   | No                            | No    | No      | Yes      | No    | Nodules    | 0         | 0                                                            | 10                                          | 1                                                                        | 2                   | 3                                                         | 2                                                       | 1; 0.5                                    | 2                                          | 2                                | 2                        | 2                                       | 2                                                                                                              |
| EoE18    | 62          | m      | Yes (oral allergy syndrome) | moderate (frequent difficulty swallowing) | Yes                           | No    | No      | Yes      | No    | No         | 7         | 1                                                            | 40                                          | 2                                                                        | 2                   | 3                                                         | 2                                                       | 1; 0.5                                    | 2                                          | 2                                | 2                        | 2                                       | 2                                                                                                              |

**Table S4. Antibodies used for flow cytometry**

| <b>Target</b>      | <b>Label</b>  | <b>Clone</b>    | <b>Isotype</b>  | <b>Company</b>       |
|--------------------|---------------|-----------------|-----------------|----------------------|
| CD73               | FITC          | AD2             | mIgG1,k         | Biologend            |
| CD49b              | APC           | P1E6-C5         | mIgG1,k         | Biologend            |
| CD112              | PE            | TX31            | mIgG1,k         | Biologend            |
| CD276              | PE            | DCN.70          | mIgG1,k         | Biologend            |
| CD325              | PE            | 8C11            | mIgG1,k         | Biologend            |
| CD53               | PE            | HI29            | mIgG1,k         | Biologend            |
| CD19               | APC/Fire750   | HIB19           | mIgG1,k         | Biologend            |
| Viability dye      | Zombie yellow | viability dye   | -               | Biologend            |
| CD39               | BV711         | A1              | mIgG1,k         | Biologend            |
| FLT1 (EIC)         | PE*           | sc-57137        | mouse           | Santa Cruz Biotech   |
| IgA                | AF488         | goat polyclonal | goat polyclonal | Jackson laboratories |
| IgM                | Perp/Cy5.5    | MHM-88          | mIgG1,k         | Biologend            |
| lambda light chain | Pacific blue  | MHL-38          | mIgG2a,k        | Biologend            |
| kappa light chain  | AF647         | MHK-49          | mIgG1,k         | Biologend            |

**Table S5. Primers used for real-time PCR**

| Target gene | Forward 5' --> 3'             | Reverse 5' --> 3'             |
|-------------|-------------------------------|-------------------------------|
| ADM         | TTG GCA GAT CAC TCT CTT AG    | TTC CAC TTC TTT CGA AAC TC    |
| CCL22       | GCG TGG TGT TGC TAA CCT TC    | CCA CGG TCA TCA GAG TAG GC    |
| CYR61       | TTG ATT GCA GTT GGA AAA GG    | GCC TTG TAA AGG GTT GTA TAG   |
| EF1A        | CTG AAC CAT CCA GGC CAA AT    | GCC GTG TGG CAA TCC AAT       |
| FGF2        | GCT GTA CTG CAA AAA CGG GG    | TAG CTT GAT GTG AGG GTC GC    |
| IL10        | GTG ATG CCC CAA GCT GAG A     | CAC GGC CTT GCT CTT GTT TT    |
| IL16        | CAG TGT TAA TCC CTA TTG CAC   | ATT GTT GAG AGA GGG ACT TC    |
| MDK         | AAG ATA AGG TGA AGA AGG GC    | TCA AAC TTG TAC TTG CAG TC    |
| PDGFA       | AAG ACC AGG ACT GTC ATT TAC G | TTG ACG CTG CTC GTG TTG C     |
| TGFB2       | ATC CTG AGC CCG AGG AAG TC    | GAT GGC ATT TTC GGA GGG GA    |
| TNFSF10     | CTT ACG TGT ACT TTA CCA ACG   | CAT TCT TGG AGT CTT TCT AAC G |
| SEMA4A      | ATC ATT AAA GAA GTC CTG GC    | ATT GTA GAC AGT GGA AGA GG    |
| VEGFA       | AAT GTG AAT GCA GAC CAA AG    | GAC TTA TAC CGG GAT TTC TTG   |

**Table S6. Antibodies used for confocal microscopy staining**

| Antibody         | Label        | Clone             | Isotype           | Company           | Order number | Concentration used |
|------------------|--------------|-------------------|-------------------|-------------------|--------------|--------------------|
| <b>Primary</b>   |              |                   |                   |                   |              |                    |
| CYR61            | -            | 3H3               | Mouse IgG1        | Novus Biologicals | NBD1-04285   | 10 ug/ml           |
| VEGF             | Dylight 633* | Rabbit polyclonal | Rabbit polyclonal | GeneTex           | GTX102643    | 5.8 ug/ml          |
| CD20             | -            | EP459Y            | Rabbit IgG        | Abcam             | AB78237      | 0.148 ug/ml        |
| CD73             | -            | 2B6               | Mouse IgG2b       | Antibodies online | ABN238367    | 10 ug/ml           |
| CD49b            | AF546**      | HAS-3             | Mouse IgG2a       | Abcam             | Ab10800      | 13 ug/ml           |
| CD138            |              | MI15              | Mouse IgG1        | Novus Biologicals | NBP1-54523   | 0.27 ug/ml         |
| IgG4             | Dy650*       | EP4420            | Rabbit            | Abcam             | Ab186921     | 10 ug/ml           |
| <b>Secondary</b> |              |                   |                   |                   |              |                    |

|                         |       |                 |                 |              |         |          |
|-------------------------|-------|-----------------|-----------------|--------------|---------|----------|
| Mouse IgG               | AF405 | goat polyclonal | goat polyclonal | Invitrogen   | A-31553 | 10 ug/ml |
| Rabbit                  | AF488 | goat polyclonal | goat polyclonal | Invitrogen   | A-11008 | 1 ug/ml  |
| Mouse IgG2b             | AF594 | goat polyclonal | goat polyclonal | Invitrogen   | A-21145 | 4 ug/ml  |
| <b>Isotype controls</b> |       |                 |                 |              |         |          |
| Mouse IgG1              |       |                 |                 | Agilent Dako | X0931   | 10 ug/ml |
| Mouse IgG2a             |       |                 |                 | Agilent Dako | X0943   | 13 ug/ml |
| Mouse IgG2b             |       |                 |                 | Agilent Dako | X0944   | 10 ug/ml |
| Rabbit                  |       |                 |                 | Agilent Dako | X0936   | 10 ug/ml |
